# Supplementary material for: Novel Ultrafine Fibrous Poly(tetrafluoroethylene) Hollow Fiber Membrane Fabricated by Electrospinning
Source: Polymers (Basel). 2018 Apr 24;10(5):464. doi: 10.3390/polym10050464 (PMC6415508; doi:10.3390/polym10050464)
Supplement: Supplementary file 1 [file polymers-10-00464-s001.pdf]

Supporting Information for

**Novel ultrafine fibrous poly(tetrafluoroethylene) hollow fiber  
membrane by electrospinning**

Qinglin Huang\*, Yan Huang, Shangpeng Gao, Mengyuan Zhang, Changfa Xiao

State Key Laboratory of Separation Membranes and Membrane Processes/ National  
Center for International Joint Research on Separation Membranes, Department of  
Material Science and Engineering, Tianjin Polytechnic University, Tianjin, 300387,  
P.R. China.

\*Corresponding author. E-mail: huangqinglin@tjpu.edu.cn; Tel.: 86-22-83955795, 399  
West Binshui Road, Xi Qing District, Tianjin Polytechnic University, Tianjin, 300387,  
P.R. China.

|                                                          |   |
|----------------------------------------------------------|---|
| S1 Characteristics of the PTFE aqueous dispersion .....  | 2 |
| S2 The basic properties of glassfiber braided tube ..... | 3 |
| S3 The composition of the spinning solutions.....        | 4 |
| S4 LEP test .....                                        | 5 |
| S5 Rheological properties.....                           | 6 |

## S1 Characteristics of the PTFE aqueous dispersion

**Table S1.** Characteristics of the PTFE aqueous dispersion

| Characteristic                          | Value              |
|-----------------------------------------|--------------------|
| Solid Content (wt %)                    | 60                 |
| Nonionic Surfactant Content (wt %)      | 5                  |
| Average Particle Size ( $\mu\text{m}$ ) | 0.19               |
| Viscosity ( $\text{Pa}\cdot\text{s}$ )  | $25\times 10^{-3}$ |
| Density ( $\text{g}/\text{cm}^3$ )      | 2.20               |
| pH (-)                                  | 9                  |

## S2 The basic properties of glassfiber braided tube

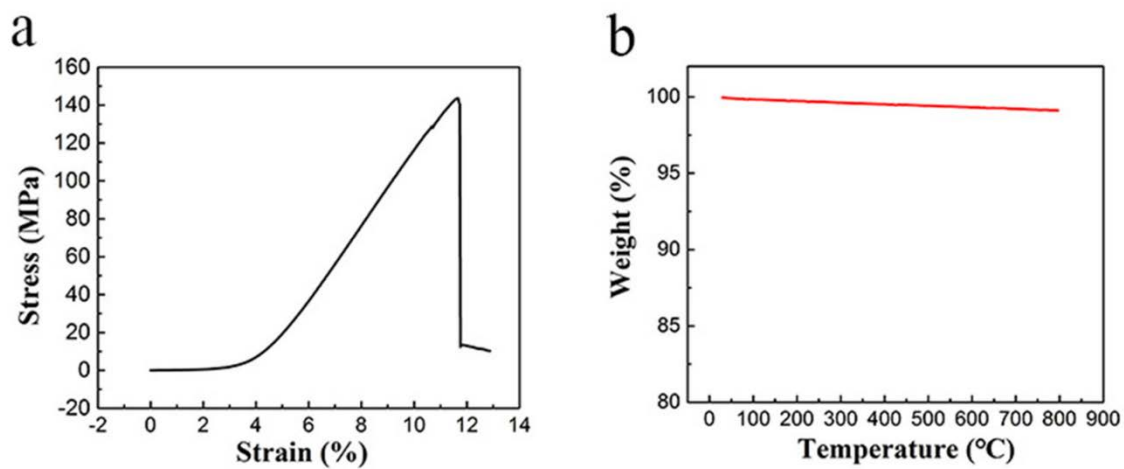

**Figure. S1** (a) Stress–strain curve and (b) TG curve of glassfiber braided tube

### S3 The composition of the spinning solutions

**Table S2.** Composition of spinning solution.

| Membrane<br>code | Spinning solution<br>Code                                                                            | PTFE/PVA<br>(wt % / wt %) | The addition of BA<br>(wt % of the solution) |
|------------------|------------------------------------------------------------------------------------------------------|---------------------------|----------------------------------------------|
| M-1              | S-1                                                                                                  | 6:1                       | 0                                            |
| M-2              | S-2                                                                                                  | 6:1                       | 0.025                                        |
| M-3              | S-2 were electrospun covering the glassfiber braided tube and then S-1 were electrospun covering S-2 |                           |                                              |

#### S4 LEP test

The LEP of water (LEP<sub>w</sub>) is the minimum pressure required for water to pass through the pores of a dry membrane. During the MD process, the exceeded transmembrane hydrostatic pressure of the LEP<sub>w</sub> would lead to pore wetting and higher conductivity of the permeate water. The LEP<sub>w</sub> of membrane was determined using a self-made setup shown in **Figure. S2**.

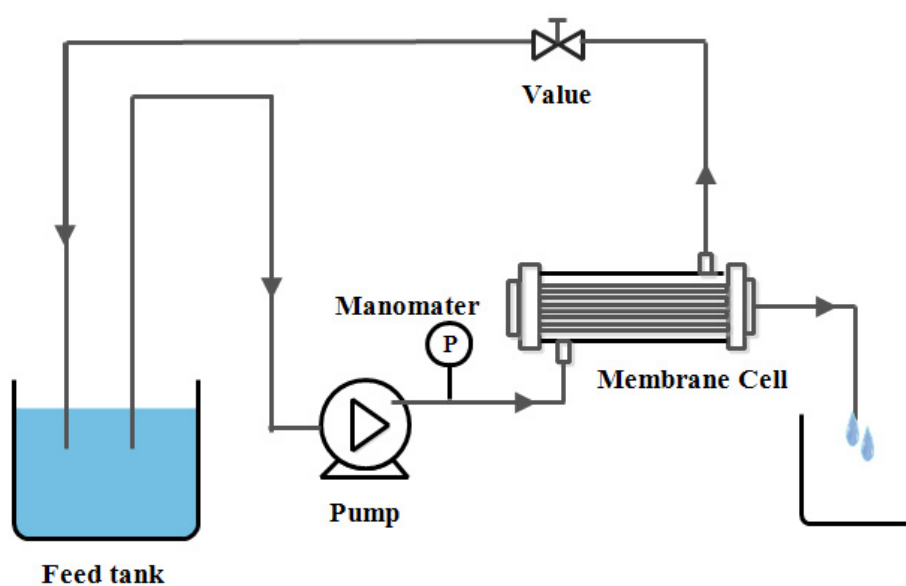

**Figure. S2** Schematic diagram of the LEP<sub>w</sub> testing device

## S5 Rheological properties

The rheological behaviour of the spinning solutions was investigated with a rheometer (HAAKE MARS, Thermo Fisher Scientific, Germany). Shear stress was measured over a range of shear rates ( $\gamma$ ) from 1 to 100  $\text{s}^{-1}$  for each sample. The temperature of spinning solution was 25 °C. The rheological curves were shown in **Figure. S3**.

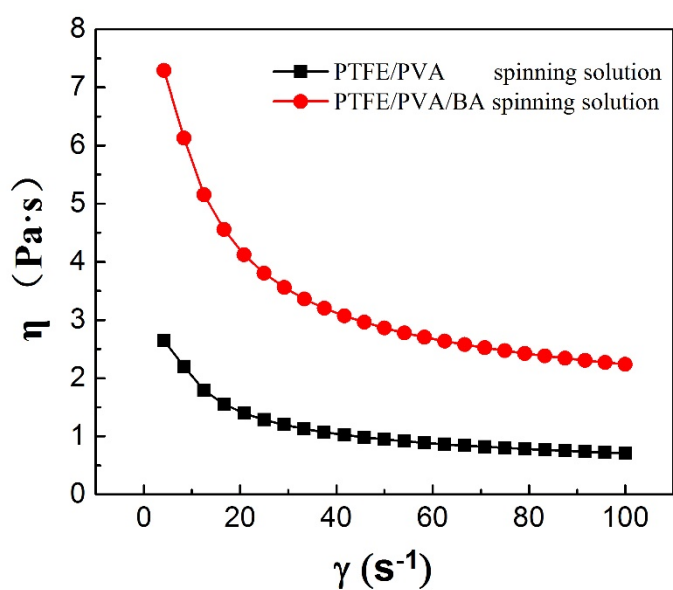

**Figure. S3** Rheological curves of different spinning solutions
